# Supplementary material for: Benchmarking global hydrological and land surface models against GRACE in a medium-sized tropical basin
Source: Copernicus journal article supplement (doi:10.5194/hess-26-4323-2022), 2022-08-24
Supplement: Supplementary file 1 [file hess-26-4323-2022-supplement.zip]

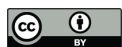

*Supplement of*

## **Impact of cry wolf effects on social preparedness and the efficiency of flood early warning systems**

**Yohei Sawada et al.**

*Correspondence to:* Yohei Sawada ([yohei.sawada@sogo.t.u-tokyo.ac.jp](mailto:yohei.sawada@sogo.t.u-tokyo.ac.jp))

The copyright of individual parts of the supplement might differ from the article licence.
